# Supplementary material
Source: PubMed Central journal article supplement (PMC6485941)
Supplement: NIHMS1521506-supplement-1.pdf [file NIHMS1521506-supplement-1.pdf]

## ***What is the current practice for choosing drugs for the prevention and treatment of sepsis in the newborn?***

### ***Best practices and guidelines***

- Guidelines for use of maternal intrapartum antibiotic prophylaxis to prevent neonatal early-onset sepsis caused by Group B *Streptococcus* and other perinatal pathogens are provided by the Centers for Disease Control and Prevention, the American College of Obstetrics and Gynecology, the American Academy of Pediatrics
- Guidance on the administration of empiric antibiotics due to concern for neonatal early-onset sepsis is informed by national epidemiologic data and provided by the American Academy of Pediatrics
- Optimal antibiotic choice for the administration of empiric antibiotics due to concern for neonatal early-onset sepsis can also be informed by local data on the antibiotic sensitivity profiles of local infecting organisms

### ***Major recommendations***

- Review and utilize national guidance on intrapartum and neonatal antibiotic choice for prevention and empiric treatment of neonatal early-onset sepsis
- Collaborate with infection control personnel to obtain local data on the antibiotic sensitivity profiles of infecting organisms to optimize empiric antibiotic choice
- Minimize prolonged use of antibiotics when cultures are sterile
- Utilize the narrowest-spectrum effective antibiotic when antibiotic sensitivity data is obtained for infecting organisms
- Account for the gestational age, postnatal age, and renal and liver function of the individual infant when choosing drug dose and dosing interval

### ***Summary statement***

Optimal drug choices for neonatal sepsis prevention and treatment are informed by microbiologic data, utilize the narrowest-spectrum effective antibiotic, and account for gestational age, postnatal age and organ function to optimize antibiotic effectiveness, minimize drug toxicities and avoid resistance-promoting selection pressures.

## References

1. Heine RP, Puopolo KM, Beigi R, Silverman NS, El-Sayed YY; Committee on Obstetric Practice. Committee Opinion No. 712: Intrapartum Management of Intraamniotic Infection. *Obstet Gynecol.* 2017;130(2):e95-e101.
2. Nanduri SA, Petit S, Smelser C, et al. Epidemiology of Invasive Early-Onset and Late-Onset Group B Streptococcal Disease in the United States, 2006 to 2015: Multistate Laboratory and Population-Based Surveillance. *JAMA Pediatr.* 2019 Jan 14. [Epub ahead of print]
3. Puopolo KM, Benitz WE, Zaoutis TE; Committee on Fetus and Newborn; Committee on Infectious Diseases. Management of Neonates Born at  $\leq 34\ 6/7$  Weeks' Gestation With Suspected or Proven Early-Onset Bacterial Sepsis. *Pediatrics.* 2018;142(6). pii: e20182896.
4. Puopolo KM, Benitz WE, Zaoutis TE; Committee on Fetus and Newborn; Committee on Infectious Diseases. Management of Neonates Born at  $\geq 35\ 0/7$  Weeks' Gestation With Suspected or Proven Early-Onset Bacterial Sepsis. *Pediatrics.* 2018;142(6). pii: e20182894.
5. Schrag SJ, Farley MM, Petit S, et al. Epidemiology of Invasive Early-Onset Neonatal Sepsis, 2005 to 2014. *Pediatrics.* 2016;138(6). pii: e20162013
6. Verani JR, McGee L, Schrag SJ; Division of Bacterial Diseases, National Center for Immunization and Respiratory Diseases, Centers for Disease Control and Prevention (CDC). Prevention of perinatal group B streptococcal disease--revised guidelines from CDC, 2010. *MMWR Recomm Rep.* 2010;59(RR-10):1-36.
